# Supplementary material for: Porous copper surfaces with improved superhydrophobicity under oil and their application in oil separation and capture from water
Source: Royal Society of Chemistry journal article supplement (doi:10.1039/c3cc43536a), 2013-01-01
Supplement: c3cc43536a.pdf [file c3cc43536a.pdf]

## **Electronic Supporting Information (ESI)**

### **Porous copper surfaces with improved superhydrophobicity under oil and their application in oil separation and capture from water**

**Dongmian Zang, Chunxiao Wu, Ruiwen Zhu, Wen Zhang, Xinquan Yu\* and Youfa Zhang\***

*Jiangsu Key Laboratory of Advanced Metallic Materials, School of Materials Science and Engineering, Southeast University, Nanjing 211189, P. R. China.*

*E-mail: 101004070@seu.edu.cn (Xinquan Yu), yfzhang@seu.edu.cn (Youfa Zhang);*

*Fax: +86 25 5209 0658; Tel: +86 25 5209 0674.*

**Preparation of superhydrophobic porous copper surfaces.** The copper samples were treated with 1 mol L<sup>-1</sup> HCl aqueous solution for 10 min, followed by rinsing with deionized water to get rid of the impurities, oxide/hydroxide layer on the surface of copper substrates. The freshly cleaned copper samples were immersed into a 0.065 M K<sub>2</sub>S<sub>2</sub>O<sub>8</sub> and 2.5 M KOH mixed aqueous solution at 60°C for 30 min. The copper samples were then taken out from the immersion solution and washed with deionized water, and dried in air. A black film was obtained, uniformly growing on the surface of copper substrates. The as-prepared CuO-grown copper samples were then immersed in a 1.0 wt% 1H, 1H, 2H, 2H-perfluorodecyltriethoxysilane (PFTS) ethanolic solution at room temperature for 30 min. After removed from the solution, the samples were heated at 80°C for 30 min.

**Instruments and Characterization.** The surface scanning electron microscopy (SEM) images were recorded on a Sirion 200 FEI instrument. The specimens were

sputtering-coated with gold prior to SEM imaging. X-ray diffraction (XRD) data were collected on XRD diffractometer (D8 Discover, Bruker-AXS) with  $\text{Cu}_{K\alpha}$  radiation ( $\lambda = 1.54056 \text{ \AA}$ ). X-ray photoelectron spectroscopy (XPS) measurements were carried out on a PHI 5000 Versa Probe UIVAC-PHI instrument with a monochromatic  $\text{Al}_{K\alpha}$  X-ray source, and the spectra were referenced to the adventitious C 1s peak (284.6 eV). The sessile drop method was used for water contact angle (CA) measurements using a Dataphysics OCA15Pro contact-angle system at ambient temperature. Water droplet (3  $\mu\text{L}$ ) was dropped carefully onto the surface to measure static, advancing and receding CA. The average CA value was determined by measuring 5 times at different spots of the same sample. Water roll-off angle (RA) was measured under the same temperature and humidity as the static water CA measurements, and the volume of the droplet was 5  $\mu\text{L}$ . The viscosities of oils were recorded on a viscometer (Brookfield DV-II+Pro).

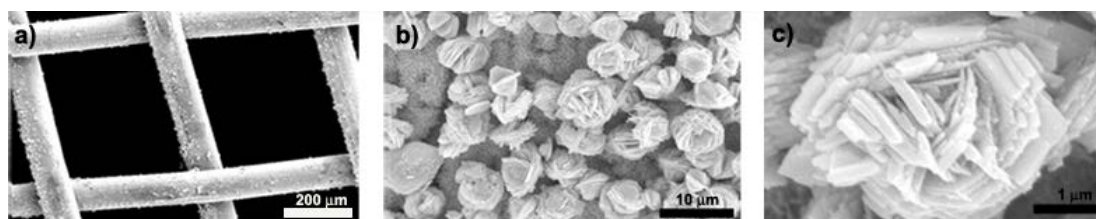

**Fig. S1** SEM images of the CuO-grown copper mesh at low resolution (a), at higher resolution (b), and close-up image of an individual flower-like spherical structure (c).

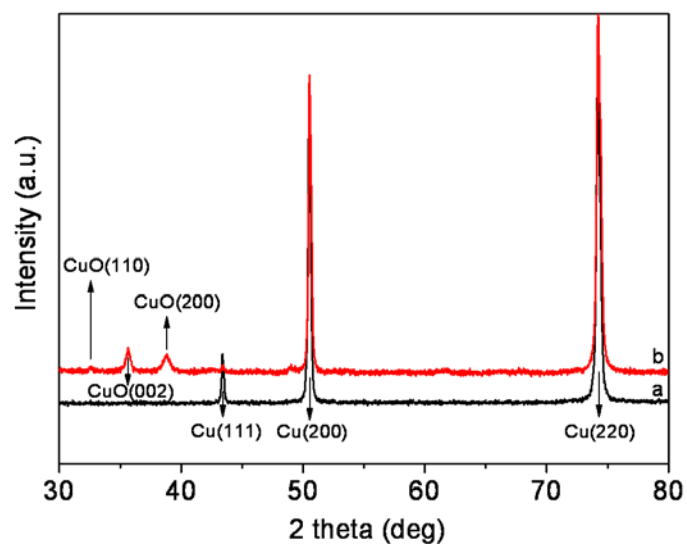

**Fig. S2** XRD patterns of Cu (a) and CuO-grown Cu (b).

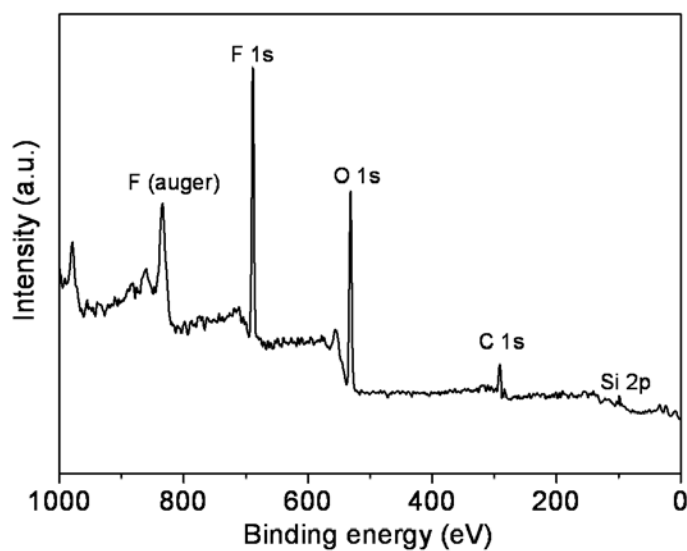

**Fig. S3** XPS survey spectra for the surface of the PFTS-modified CuO-grown copper sample.

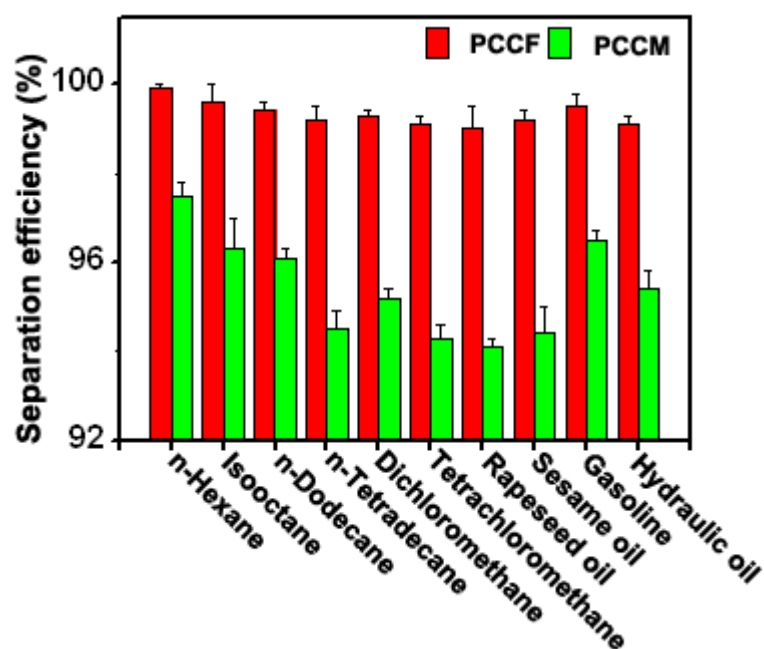

**Fig. S4** The separation efficiency of PCCF and PCCM for a selection of oils.

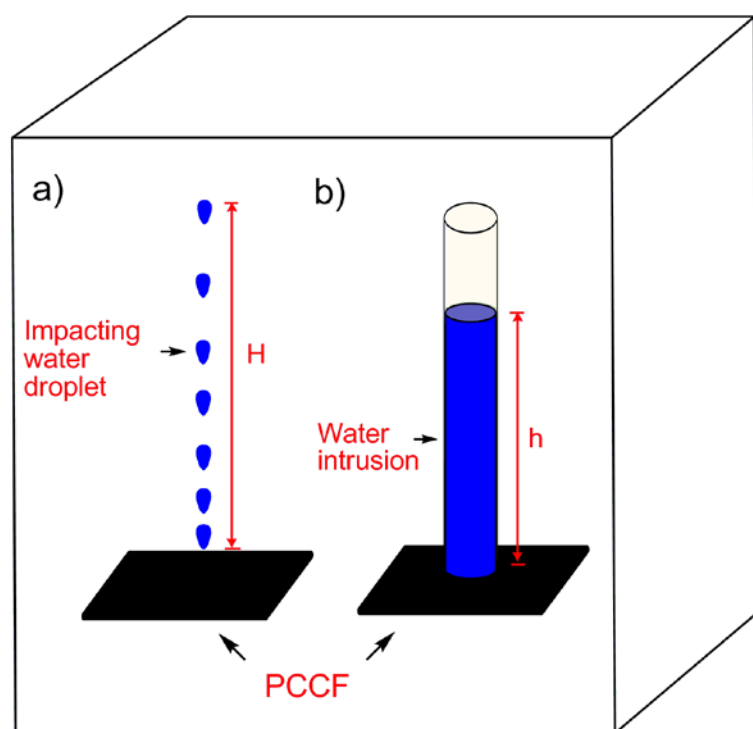

**Fig. S5** Schematic illustration of the critical water impact dynamic pressure (a) and water intrusion pressure (b) on PCCF.

**Table S1.** Viscosities of the oils at room temperature ( $25\pm1^\circ\text{C}$ ).<sup>1-8</sup>

| Oil                        | Viscosity (mPa s) |            |
|----------------------------|-------------------|------------|
|                            | This work         | Literature |
| <i>n</i> -Hexane           | 0.26              | 0.29       |
| Isooctane                  | 0.47              | 0.49       |
| Rapeseed oil               | 77.3              | 78.8       |
| Sesame oil                 | 61.9              | 60.4       |
| <i>n</i> -Dodecane         | 1.36              | 1.34       |
| <i>n</i> -Tetradecane      | 2.05              | 2.08       |
| Dichloromethane            | 0.41              | 0.38       |
| Tetrachloromethane         | 0.79              | 0.82       |
| Gasoline <sup>a</sup>      | 0.47              | 0.45       |
| Hydraulic oil <sup>b</sup> | 46.1              | 46.6       |

<sup>a</sup> The viscosity of gasoline is given at 20°C.

<sup>b</sup> Hydraulic oil is a sample of classification HM, ISO 46. Its viscosity is given at 40°C in  $\text{mm}^2 \text{s}^{-1}$ .

**Table S2.** Comparison of wettability, impacting dynamic pressure and intrusion pressure of the PFTS-modified CuO-grown copper foam and mesh with same pore diameter and different thickness.

| Parameter                                         | Cu foam          | Cu mesh         |
|---------------------------------------------------|------------------|-----------------|
| Pore diameter as-received ( $\mu\text{m}$ )       | 450 $\pm$ 31     | 450 $\pm$ 29    |
| Thickness as-received (mm)                        | 1.7 $\pm$ 0.2    | 0.1 $\pm$ 0.02  |
| Static water CA in air ( $^{\circ}$ )             | 157.6 $\pm$ 3.2  | 156.9 $\pm$ 2.3 |
| Water RA in air ( $^{\circ}$ )                    | 5.0 $\pm$ 0.6    | 7.2 $\pm$ 0.9   |
| Advancing water CA in air ( $^{\circ}$ )          | 159.4 $\pm$ 2.9  | 158.3 $\pm$ 3.1 |
| Receding water CA in air ( $^{\circ}$ )           | 154.7 $\pm$ 2.4  | 151.8 $\pm$ 2.5 |
| Static water CA under isooctane ( $^{\circ}$ )    | 171.2 $\pm$ 2.7  | 170.3 $\pm$ 2.1 |
| Water RA under isooctane ( $^{\circ}$ )           | < 1              | < 3             |
| Advancing water CA under isooctane ( $^{\circ}$ ) | N/A (rolled off) | 172.1 $\pm$ 1.8 |
| Receding water CA under isooctane ( $^{\circ}$ )  | N/A (rolled off) | 169.2 $\pm$ 2.3 |
| Impacting dynamic pressure (kPa)                  | 1.88 $\pm$ 0.04  | 0.28 $\pm$ 0.01 |
| Intrusion pressure (kPa)                          | 1.13 $\pm$ 0.01  | 0.45 $\pm$ 0.01 |

**Movie S1** A video for oil/water separation studies of PCCF.

**Movie S2** Process for oils capture on water surface and underwater.

## References

- 1 I. L. Acevedo, G. C. Pedrosa, M. Katz, L. Mussari and M. A. Postigo, *J. Solut. Chem.*, 2000, **29**, 1237.
- 2 M. I. Aralaguppi, C. V. Jadar and T. M. Aminabhavi, *J. Chem. Eng. Data*, 1999, **44**, 435.
- 3 H. Nouredini, B. C. Teoh and L. D. Clements, *J. Am. Oil Chem. Soc.*, 1992, **69**, 1189.
- 4 C. W. Fountain, J. Jennings, C. K. McKie, P. Oakman and M. L. Fetterolf, *J. Chem. Educ.*, 1997, **74**, 224.
- 5 D. R. Caudwell, J. P. M. Trusler, V. Vesovic and W. A. Wakeham, *Int. J. Thermophys.*, 2004, **25**, 1339.
- 6 C. Franjo, L. Segade, C. P. Menaut, J. M. Pico and E. Jimenez, *J. Solut. Chem.*, 2001, **30**, 995.
- 7 T. M. Aminabhavi and K. Banerjee, *J. Chem. Eng. Data*, 1998, **43**, 1096.
- 8 F. Fagerlund and A. Niemi, *J. Contam. Hydrol.*, 2007, **89**, 174.
